# Supplementary material for: Erythrocyte Concentrates Recovered from Under-Collected Whole Blood: Experimental and Clinical Results
Source: PubMed Central journal article supplement (PMC4338272; doi:10.1371/journal.pone.0117928), 2015-02-23
Supplement: pone.0117928.s005.pdf [file pone.0117928.s005.pdf]

## **Adverse Transfusion Events (ATEs)**

### **1. Incidents**

Incident is a deviation from standard operating procedure or hospital policy during the transfusion process.

Examples:

- Mislabeled specimens
- Blood component ordered for the wrong patient
- Wrong component ordered for patient
- Laboratory error
- Component administered to wrong patient
- Incorrect equipment used for the transfusion
- Dispensing of expired or unsuitable component

**1.1 Complete incident:** Incident which was recognised after transfusion started or occurred during transfusion.

**1.2 Near miss incident:** Incident which was recognised before transfusion started.

### **2. Complications**

Complications are adverse reactions to or adverse effects of the transfused blood components.

2.1. Transfusion-transmitted infections (TTI)

2.2 Immune Complications of Transfusion (ICT)

2.3 Cardiovascular and Metabolic Complications of Transfusion (CMCT)

2.4 Previously Unknown Complication of Transfusion (PUCT)

(see next pages)

## EHN Working Party on Definitions of ATEs

### 2.1. Transfusion-transmitted infections (TTI)

| Infectious agent                        | Definition                                                                                                                                                                                                                                                                                                                                                                                                                                                                                                                                                                                                                                                                                                                                                                                                                                                                                                                                                                                                                                                                                           |
|-----------------------------------------|------------------------------------------------------------------------------------------------------------------------------------------------------------------------------------------------------------------------------------------------------------------------------------------------------------------------------------------------------------------------------------------------------------------------------------------------------------------------------------------------------------------------------------------------------------------------------------------------------------------------------------------------------------------------------------------------------------------------------------------------------------------------------------------------------------------------------------------------------------------------------------------------------------------------------------------------------------------------------------------------------------------------------------------------------------------------------------------------------|
| <b>2.1.1 Viral infection (TTVI)</b>     | Following investigation, the recipient has evidence of infection post-transfusion and no clinical or laboratory evidence of infection prior to transfusion and <b>either</b> , at least one component received by the infected recipient was donated by a donor who had evidence of the same infection, <b>or</b> , at least one component received by the infected recipient was shown to have been contaminated with the virus.                                                                                                                                                                                                                                                                                                                                                                                                                                                                                                                                                                                                                                                                    |
| <b>2.1.2 Bacterial infection (TTBI)</b> | <p><i>TTBI should be <u>clinically suspected</u> if:</i></p> <ul style="list-style-type: none"> <li>• fever <math>\geq 39^{\circ}\text{C}</math> or a change of <math>\geq 2^{\circ}\text{C}</math> from pretransfusion value <u>and</u></li> <li>• rigors <u>and</u></li> <li>• tachycardia <math>\geq 120</math> beats / min <u>or</u> a change of <math>\geq 40</math> beats / min from pretransfusion value <u>or</u> a rise or drop of 30 mm Hg in systolic blood pressure within 4 hours of transfusion are present.</li> </ul> <p><i>Possible TTBI:</i></p> <ul style="list-style-type: none"> <li>• detection of bacteria by approved techniques in the transfused blood component but not in the recipient's blood or</li> <li>• detection of bacteria in the recipient's blood following transfusion but not in the transfused blood component and no other reasons are ascertainable for the positive blood culture.</li> </ul> <p><i>Confirmed TTBI:</i> detection of the same bacterial strain in the recipient's blood and in the transfused blood product by approved techniques.</p> |
| <b>2.1.3 Parasites (TTPI)</b>           | Detection of the same parasite in the recipient's blood and parasite or specific antibodies in the donor blood                                                                                                                                                                                                                                                                                                                                                                                                                                                                                                                                                                                                                                                                                                                                                                                                                                                                                                                                                                                       |

## EHN Working Party on Definitions of ATEs

### 2.2 Immune Complications of Transfusion (ICT)

| Complication                                                                               | Definition                                                                                                                                                                                                                                                                                                                                                                                                                                                                                                                                                                                                                                                                                                                                                                                                                                                                                                                                                                                                                                                                |
|--------------------------------------------------------------------------------------------|---------------------------------------------------------------------------------------------------------------------------------------------------------------------------------------------------------------------------------------------------------------------------------------------------------------------------------------------------------------------------------------------------------------------------------------------------------------------------------------------------------------------------------------------------------------------------------------------------------------------------------------------------------------------------------------------------------------------------------------------------------------------------------------------------------------------------------------------------------------------------------------------------------------------------------------------------------------------------------------------------------------------------------------------------------------------------|
| 2.2.1 Haemolytic transfusion reaction (HTR)                                                | <p>HTR is clinically suspected if one or more of :</p> <ul style="list-style-type: none"> <li>• fever and a variety of other symptoms (including dyspnea, hypotension, tachycardia, flank or back pain, etc)</li> <li>• inadequate rise of post-transfusion hemoglobin level</li> <li>• drop in haemoglobin level (<math>\geq 2\text{g/dl}</math> within 24 hours)</li> <li>• rise in LDH (<math>\geq 50\%</math> within 24 hours)</li> <li>• rise in bilirubin, haemoglobinaemia, decrease in haptoglobin</li> </ul> <p>is present in a temporal association with transfusion.</p> <p>HTR is confirmed by a</p> <ul style="list-style-type: none"> <li>• a positive direct antiglobulin test and</li> <li>• a positive erythrocyte cross-match.</li> </ul> <hr style="border-top: 1px dashed black;"/> <p>(Two <i>subtypes</i> of HTR are clinically distinguished:</p> <ul style="list-style-type: none"> <li>• <i>Acute HTR</i>: occurrence within 24 hours of transfusion</li> <li>• <i>Delayed HTR</i>: occurrence between 1 – 28 days after transfusion)</li> </ul> |
| 2.2.2 Febrile non-haemolytic transfusion reaction (FNHTR) (Transfusion-related discomfort) | <p>One or more of:</p> <ul style="list-style-type: none"> <li>• fever (<math>\geq 38^\circ\text{C}</math> or a change of <math>\geq 1^\circ\text{C}</math> from pretransfusion value)</li> <li>• chills</li> <li>• cold</li> <li>• rigor</li> <li>• (other symptoms of discomfort)</li> </ul> <p>during or within 4 hours following transfusion without any other cause such as HTR or TTBI.</p>                                                                                                                                                                                                                                                                                                                                                                                                                                                                                                                                                                                                                                                                          |
| 2.2.3 Transfusion-related acute lung injury (TRALI)                                        | <ul style="list-style-type: none"> <li>• acute respiratory distress <u>and</u></li> <li>• bilateral lung infiltrations in the chest radiograph <u>and</u></li> <li>• occurrence during or within 6 hours of the completion of the transfusion <u>and</u></li> <li>• no evidence of transfusion-associated circulatory overload</li> </ul> <hr style="border-top: 1px dashed black;"/> <p>(<i>Subtypes</i>, determination is not necessary for diagnosis):</p> <ul style="list-style-type: none"> <li>• <i>Immune (antibody-mediated) TRALI</i> is confirmed by the detection of leucocyte (HLA and HNA) antibodies in the donor's or recipient's blood and a corresponding leucocyte antigen typing or a positive granulocyte cross-match.</li> <li>• <i>Non-immune (not antibody-mediated) TRALI</i>: No leucocyte antibodies detectable by reference laboratories using accepted techniques</li> </ul>                                                                                                                                                                  |

## EHN Working Party on Definitions of ATEs

| Complication                                                          | Definition                                                                                                                                                                                                                                                                                                                          |
|-----------------------------------------------------------------------|-------------------------------------------------------------------------------------------------------------------------------------------------------------------------------------------------------------------------------------------------------------------------------------------------------------------------------------|
| 2.2.4 Transfusion-induced graft versus host disease (TI-GVHD)         | Fever, rash, liver dysfunction, diarrhea and cytopenia 1 – 6 weeks following transfusion with no other apparent cause. GVHD is confirmed by GVHD-typical biopsy and by genetic analysis to show chimerism of recipient and donor lymphocytes                                                                                        |
| 2.2.5 Posttransfusion purpura (PTP)                                   | Purpura and thrombocytopenia within 12 days after transfusion.<br>PTP is confirmed by the detection of platelet-specific antibodies (usually anti-HPA-1a) in the recipient's blood and by a corresponding platelet antigen typing of the donor or by a positive platelet cross-match                                                |
| 2.2.6 Allergic reaction                                               | One or more of: <ul style="list-style-type: none"> <li>• rash,</li> <li>• allergic dyspnea (stridor, cyanosis, wheezing)</li> <li>• angioedema</li> <li>• generalized pruritus</li> <li>• urticaria</li> </ul> without hypotension during or within 24 hours of transfusion                                                         |
| 2.2.7 Anaphylactoid reaction                                          | Allergic reaction with hypotension (drop in systolic blood pressure by $\geq 30$ mm Hg) during or within 24 hours of transfusion                                                                                                                                                                                                    |
| 2.2.8 Anaphylactic shock                                              | Intractable hypotension or shock with loss of consciousness during transfusion, and without any indication of other cause                                                                                                                                                                                                           |
| 2.2.9 Alloimmunization                                                | Formation of alloantibodies to RBC, HLA, HPA and HNA antigens which were not detectable pretransfusion.                                                                                                                                                                                                                             |
| 2.2.10 Transfusion-associated autoimmune haemolytic anaemia (TA-AIHA) | Haemolysis-related symptoms (pallor, tachycardia, hyperventilation etc.) in a temporal association with transfusion.<br>TA-AIHA is confirmed by a drop in haemoglobin level, a positive direct antiglobulin test and an eluate revealing an erythrocyte autoantibody which was not present in the recipient's blood pretransfusion. |

### 2.3 Cardiovascular and Metabolic Complications of Transfusion (CMCT)

| Complication                                             | Definition                                                                                                                                                                                                                                              |
|----------------------------------------------------------|---------------------------------------------------------------------------------------------------------------------------------------------------------------------------------------------------------------------------------------------------------|
| 2.3.1 Transfusion-associated circulatory overload (TACO) | Respiratory distress, tachycardia, increased blood pressure, typical signs of cardiogenic lung oedema in the chest x-ray, evidence of a positive fluid balance and / or a known compromised cardiac status during or within 12 hours after transfusion. |
| 2.3.2 Transfusion-associated dyspnea (TAD)               | Respiratory distress in temporal association with blood transfusion with no evidence of TRALI, allergic dyspnea or TACO.                                                                                                                                |
| 2.3.3 Hypothermia                                        | Decrease of body temperature associated with transfusion resulting in dyspnea, hypotension and / or cardiac dysfunction                                                                                                                                 |
| 2.3.4 Hyperkalaemia                                      | Abnormal increase of the potassium level associated with transfusion resulting in cardiac arrhythmias and / or dysfunction                                                                                                                              |
| 2.3.5 Hypocalcemia                                       | Abnormal decrease of the calcium level associated with transfusion resulting in carpopedal spasm and/or cardiac arrhythmias and / or dysfunction                                                                                                        |
| 2.3.6 Haemosiderosis                                     | Iron overload as indicated by laboratory findings or biopsy due to chronic transfusion which can result in organ injury (heart, liver, lung and / or endocrine glands).                                                                                 |
| 2.3.7 Hypotension                                        | Drop in systolic blood pressure by $\geq 30$ mm Hg during or within 4 hours of the completion of the transfusion and no evidence of other complications.                                                                                                |
| 2.3.8 Hypertension                                       | Rise in systolic blood pressure by $\geq 30$ mm Hg during or within 4 hours of the completion of the transfusion and no evidence of other complications.                                                                                                |

### 2.4 Previously Unknown Complication of Transfusion (PUCT)

Occurrence of an adverse effect or reaction temporally related to transfusion, which cannot be attributed to the already defined side effects (2.1- 2.3) and with no risk factor other than transfusion.
